# Supplementary material
Source: PubMed Central journal article supplement (PMC5884106)
Supplement: NIHMS943606-supplement-Supplemental.pdf [file NIHMS943606-supplement-Supplemental.pdf]

Table S1. Network Composition and Risk Behavior Across Race Networks of People Who Inject Drugs, HIV Prevention Trial Network 037

|                                                                 | All-Black Networks | All-White Networks | All-Hispanic Networks | Racially Mixed Networks |
|-----------------------------------------------------------------|--------------------|--------------------|-----------------------|-------------------------|
| Number of networks, n (%)                                       | 85 (34.5)          | 80 (36.6)          | 5 (2.2)               | 62 (26.7)               |
| Network size, average (min-max)*                                | 3.0 (1-7)          | 2.7 (2-7)          | 3.2 (2-5)             | 3.3 (2-7)               |
| Count of HIV+ individuals                                       |                    |                    |                       |                         |
| Average (min-max)                                               | 0.32 (0-4)         | 0.12 (0-2)         | 0                     | 0.21 (0-2)              |
| 0 HIV+ individuals                                              | 63                 | 71                 | 5                     | 50                      |
| 1 HIV+ individual                                               | 19                 | 8                  | 0                     | 11                      |
| 2 HIV+ individuals                                              | 2                  | 1                  | 0                     | 1                       |
| 4 HIV+ individuals                                              | 1                  | 0                  | 0                     | 0                       |
| <b>A. Drug risk</b>                                             |                    |                    |                       |                         |
| Needle sharing in the past month, n (%)                         | 19 (22.3)          | 32 (40.0)          | 3 (60)                | 25 (40.3)               |
| <b>B. Sex risk</b>                                              |                    |                    |                       |                         |
| Number of unprotected sex events in the past week, average (SD) | 1.8 (1.7)          | 1.7 (1.8)          | 2.7 (1.6)             | 2.1 (2.0)               |
| Number of sex partners in the past month, average (SD)          | 2.4 (3.1)          | 2.3 (3.9)          | 1.5 (0.3)             | 2.5 (3.1)               |

\*Excludes the index participant who is HIV negative

Table S2. Network Characteristics Associated with Being in an HIV Positive Network of People Who Inject Drugs, HIV Prevention Trial Network 037.

| Network Characteristics                           | Membership in HIV+ network, AOR (95% CI) |
|---------------------------------------------------|------------------------------------------|
| Racial Homophily                                  |                                          |
| All-white                                         | ref                                      |
| All-black                                         | 2.4 (1.0-6.0)                            |
| All-Hispanic                                      | omitted*                                 |
| Racially-mixed                                    | 1.6 (0.6-4.2)                            |
| Needle sharing in the past month                  | 0.8 (0.3-2.5)                            |
| Number of unprotected sex events in the past week | 1.0 (0.8-1.2)                            |
| Number of sexual partners in the past month       | 0.9 (0.7-1.0)                            |
| Network size                                      | 1.4 (1.1-1.8)                            |

\*There was no variability of HIV status among Hispanics; for this reason, they were omitted from the model.

\*\*The multivariable logistic regression included race networks, network drug and sex risk behaviors and network size. This analysis was done at the network level (n=232).
